# Supplementary material
Source: MDPI journal article supplement (https://www.mdpi.com/2076-3417/7/5/433)
Supplement: s1 [file s1]

## Supporting Information

# Formation of boundary film from ionic liquids enhanced by additives

*Erik Nyberg\*, Johanne Mouzon, Mattias Grahn, Ichiro Minami*

\*Corresponding author: [erik.nyberg@ltu.se](mailto:erik.nyberg@ltu.se)

This file includes:

**1. Lubricant data**

**2. Additional results**

- a. C{150 N/25 °C/30 min} – Wear scars
- b. V{100–300 N/25 °C/120 min} – Wear scars
- c. V{150 N/40–100 °C/80 min} – EDS spectra
- d. V{300 N/40–80 °C/60 min} – Disc wear profile map
- e. C{300 N/80 °C/30 min} – Wear scars

## 1. Lubricant data

Five P-SiSO have been synthesized by Nisshinbo Holdings Inc. (Tokyo). The chemical structures is given by the formula  $[(n-C_{\alpha}H_{2\alpha+1})_3(n-C_{\beta}H_{2\beta+1})P]_3[(C_{\chi}H_{2\chi+1})_3SiC_{\delta}H_{2\delta}SO_3]$ , where the variables  $\alpha$ ,  $\beta$ ,  $\chi$ , and  $\delta$  determine the number of carbon atoms in the alkyl groups. Reported properties can be seen in Table S 1 **Error! Reference source not found.** The bulkier cations, [4-16], and [6-14], have lower viscosities than the smaller [4-12] cation, as expected due to the weaker ion bonds in bulkier ions. In this work, only P-SiSO [6-14][1-2] have been evaluated. The PFPE sample was supplied by Aldrich and used as received, the properties are shown in Table S 2, with the full name of PFPE being Fomblin Y 317950. A fully formulated gear oil, Shell Spirax S6 AXME 75W-90 GL-5 is used in test V{100–300 N/25 °C/120 min}.

**Table S 1. Properties of P-SiSO.**

| Code              | Density, g cm <sup>-3</sup> | Viscosity, mPa·s |       | Melting point, °C | 10% weight loss at, °C | Water content, ppm | Chemical formula                                             |
|-------------------|-----------------------------|------------------|-------|-------------------|------------------------|--------------------|--------------------------------------------------------------|
|                   | 25 °C                       | 25 °C            | 60 °C |                   |                        |                    |                                                              |
| P-SiSO[4-12][1-2] | 0.90                        | 2570             | 208   | -6                | 311                    | 68                 | $[(n-C_4H_9)_3(n-C_{12}H_{25})P]_3[(CH_3)_3SiC_2H_4SO_3]$    |
| P-SiSO[4-12][1-3] | 0.93                        | 2429             | 104   | 2                 | 291                    | 93                 | $[(n-C_4H_9)_3(n-C_{12}H_{25})P]_3[(CH_3)_3SiC_3H_6SO_3]$    |
| P-SiSO[4-16][1-2] | 0.91                        | 1932             | 269   | 5                 | 316                    | 137                | $[(n-C_4H_9)_3(n-C_{16}H_{33})P]_3[(CH_3)_3SiC_2H_4SO_3]$    |
| P-SiSO[4-16][1-3] | 0.90                        | 1735             | 142   | -5                | 299                    | 68                 | $[(n-C_4H_9)_3(n-C_{16}H_{33})P]_3[(CH_3)_3SiC_3H_6SO_3]$    |
| P-SiSO[6-14][1-2] | 0.92                        | 1879             | 200   | -19               | 310                    | 83                 | $[(n-C_6H_{13})_3(n-C_{14}H_{29})P]_3[(CH_3)_3SiC_2H_4SO_3]$ |

**Table S 2. Properties of PFPE.**

| Code           | Density, g cm <sup>-3</sup> | Viscosity, mPa·s |       | Flash Poin |
|----------------|-----------------------------|------------------|-------|------------|
|                | 25 °C                       | 20 °C            | 60 °C |            |
| PFPE (Fomblin) | 1.90                        | 513              | x     | >113       |

## 2. Additional tribotest data

### a. Scenario I

Wear scar results from C{150 N/25 °C/30 min}.

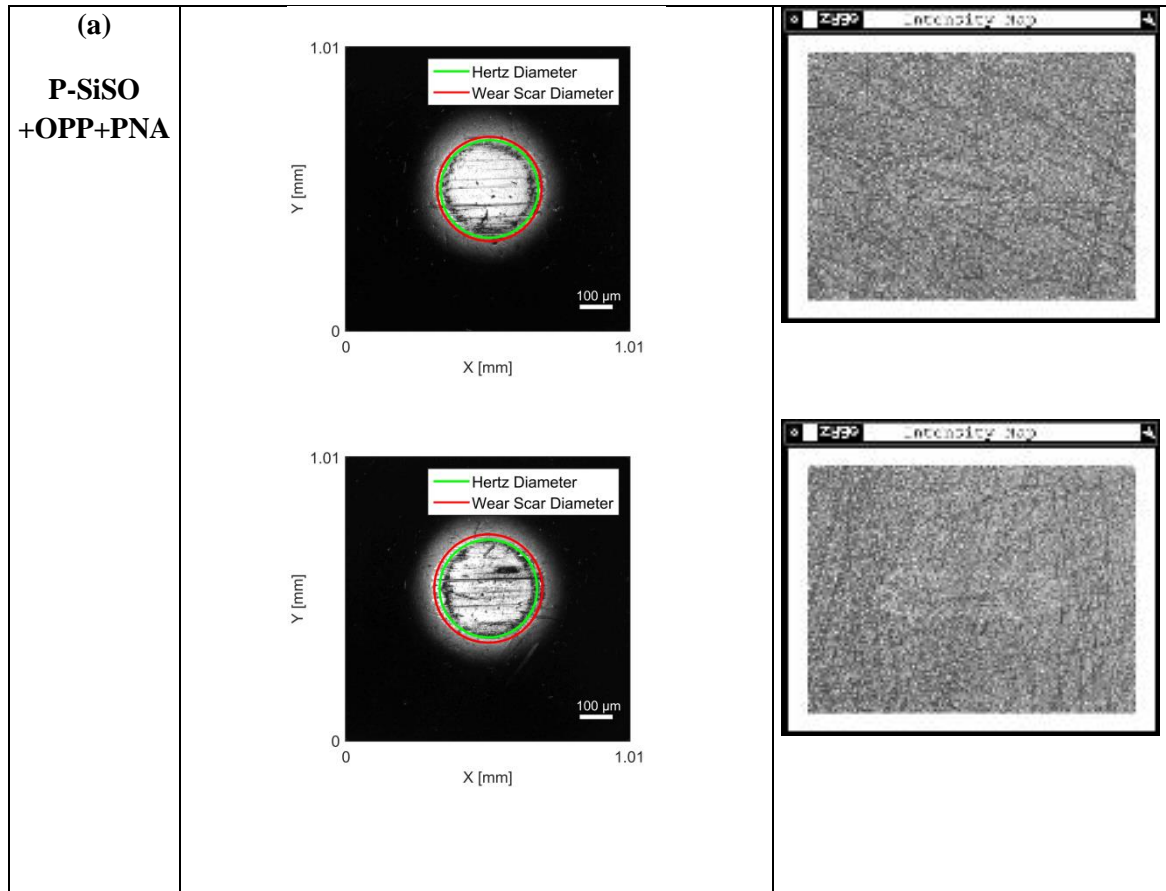

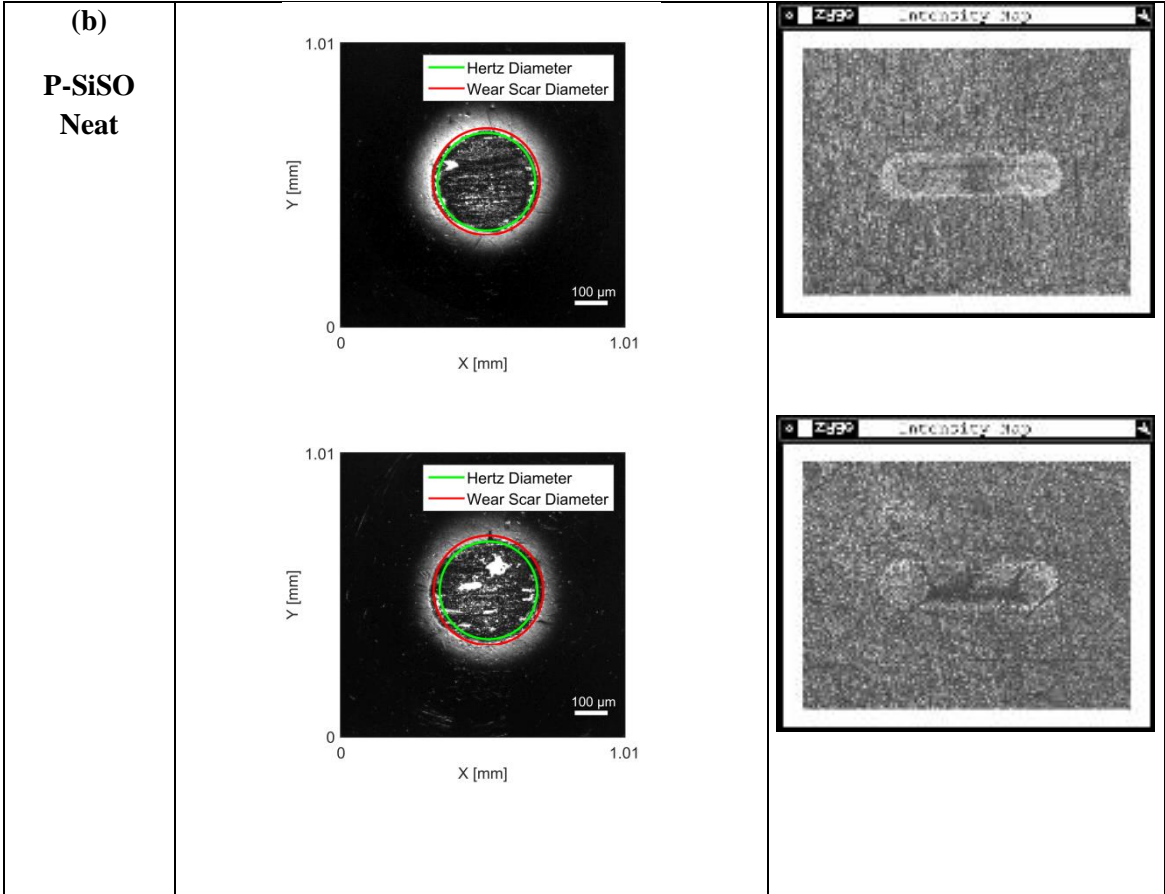

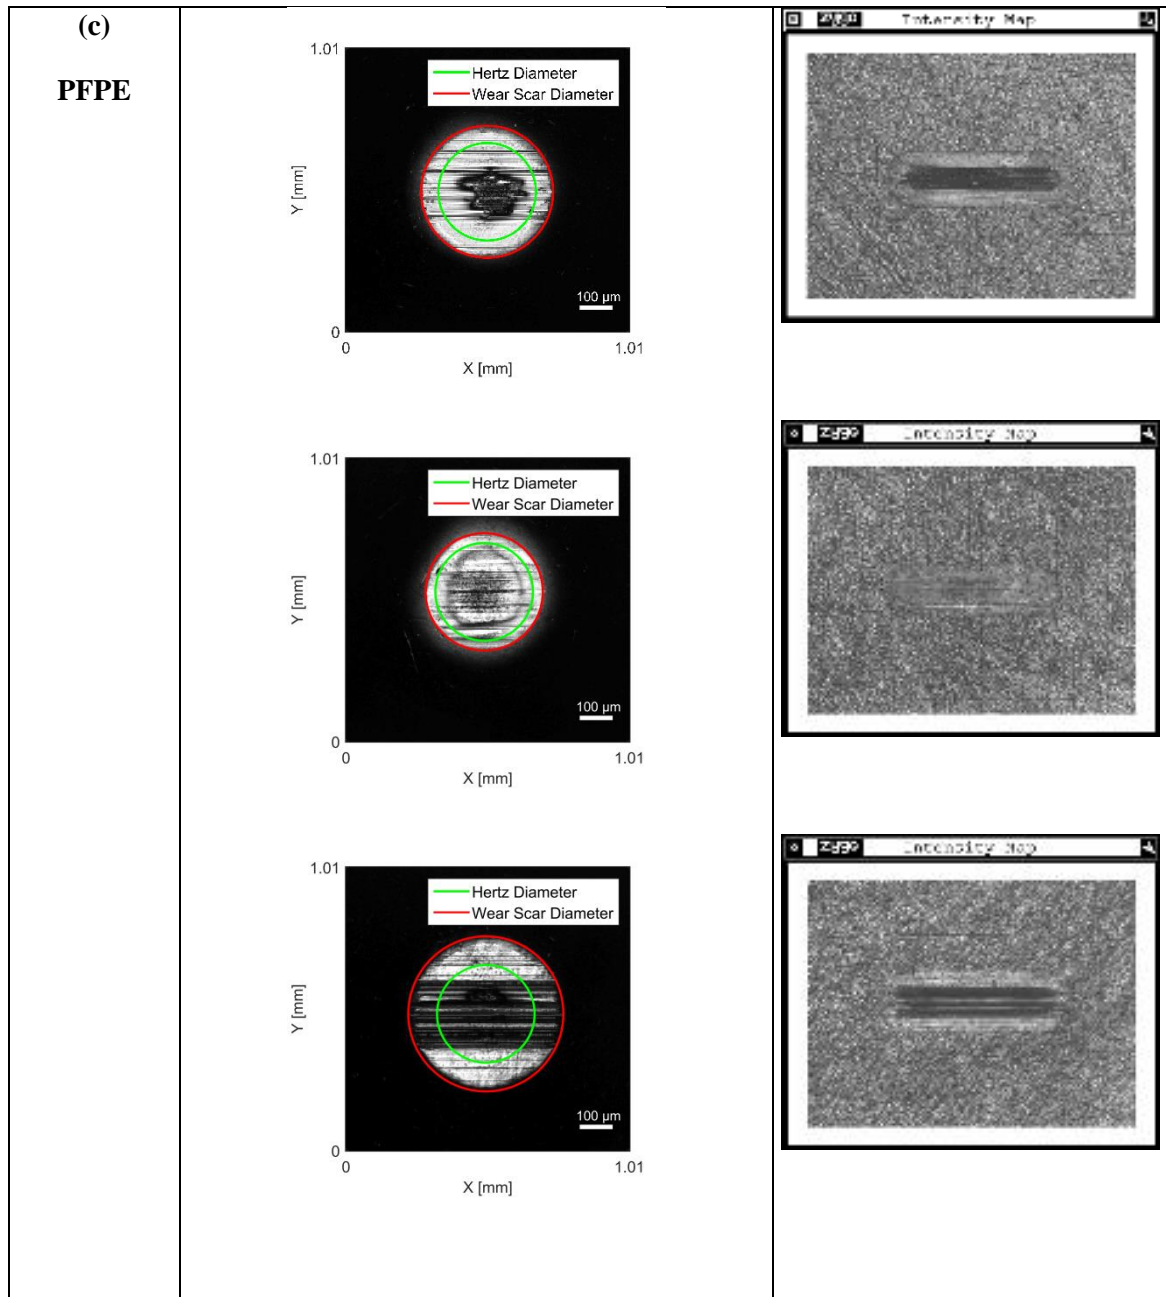

Figure S 1. Wear scars of (a) P-SiSO +PNA+OPP, (b) neat P-SiSO, (c) PFPE after test C{150 N/25 °C/30 min} (Corresponds to Figure 2). Disc image depicts reflected intensity for field of view 2.53 mm X 1.90 mm.

**b. Scenario II**

V{100–300 N/25 °C/120 min}

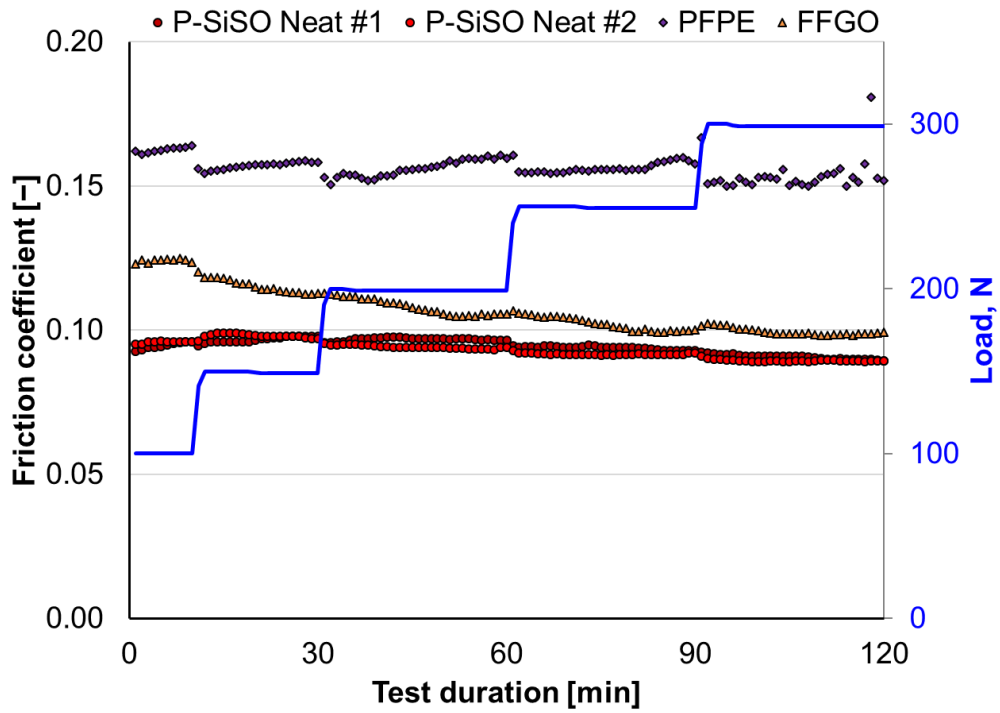

(a)

(b)  
PFPE

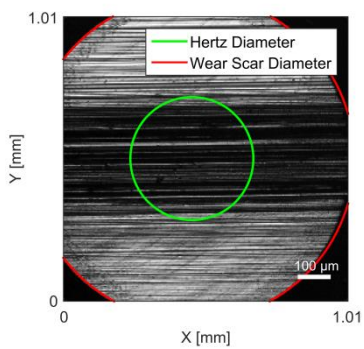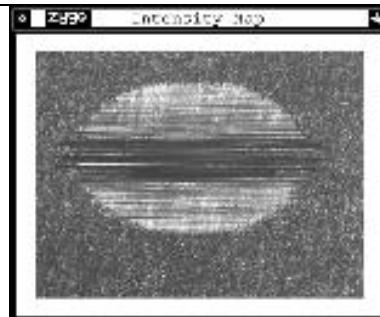

(c)  
GL-5

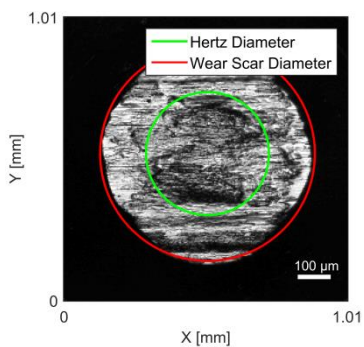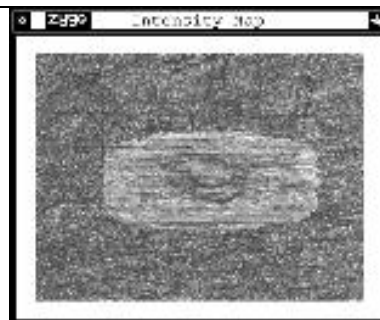

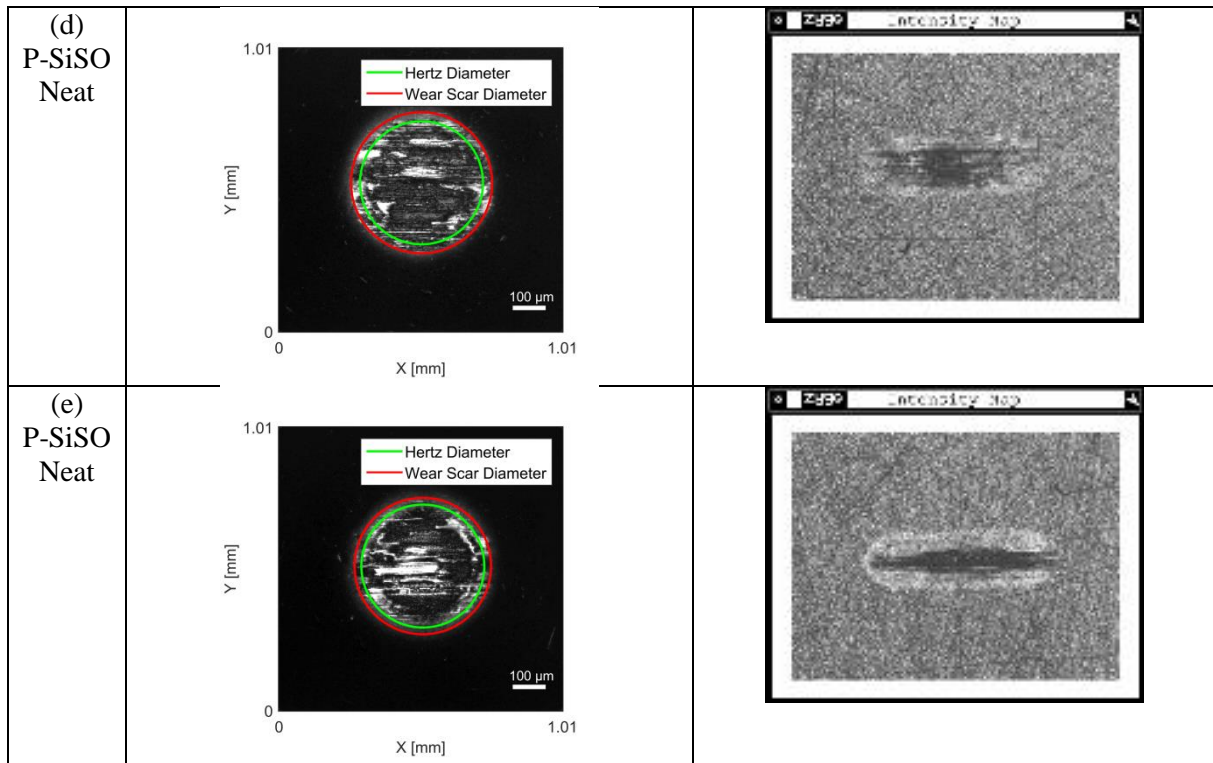

Figure S 2. (a) Friction trace  $V\{100-300\text{ N}/25\text{ }^\circ\text{C}/120\text{ min}\}$ , (b) and (c), ball wear scars of neat P-SiSO, (d), wear scar of PFPE, (e), wear scar of GL-5 fully formulated gear oil.

### $V\{150\text{ N}/40-100\text{ }^\circ\text{C}/80\text{ min}\}$

EDS point mapping of tribofilm in Figure 5 (c). The electron beam is concentrated first at the center of the largest dark patch seen in Figure 5 (c), then at an adjacent bright region where no boundary film is visible. Spectrum show dark patch is rich in Si and O, P or S is not detected. The bright region is similar to an unused reference steel disc (labeled Ref: AISI52100), but with less O, as shown by the spectra in Figure S 3.

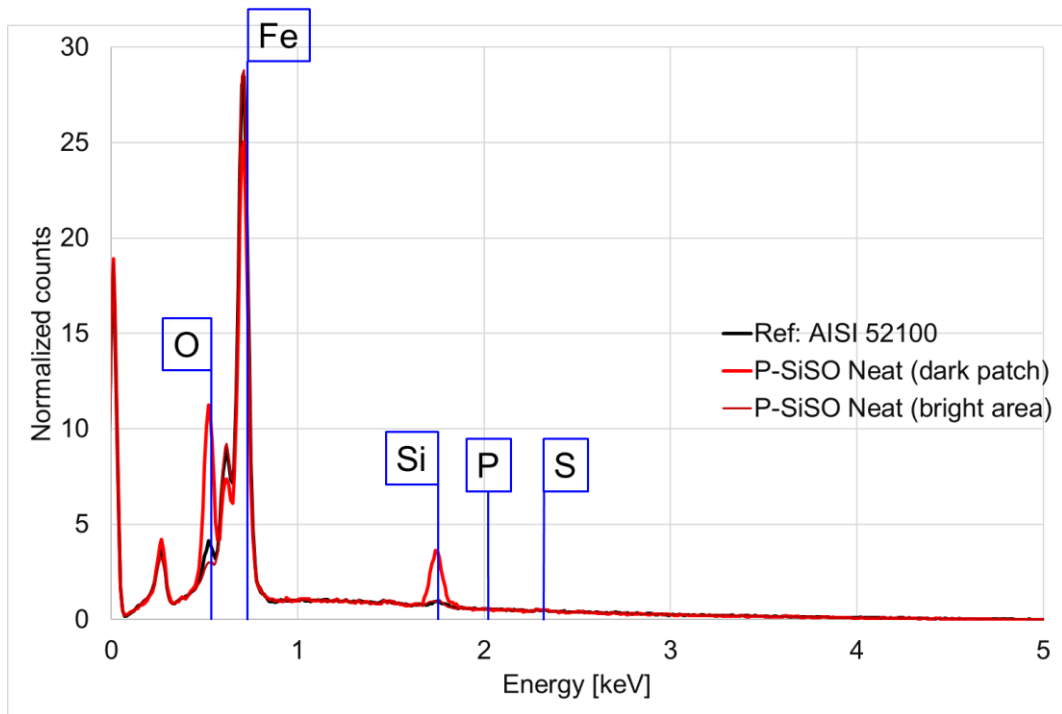

Figure S 3. EDS spectra corresponding to Figure 5 (c).

V{300 N/40–80 °C/60 min}

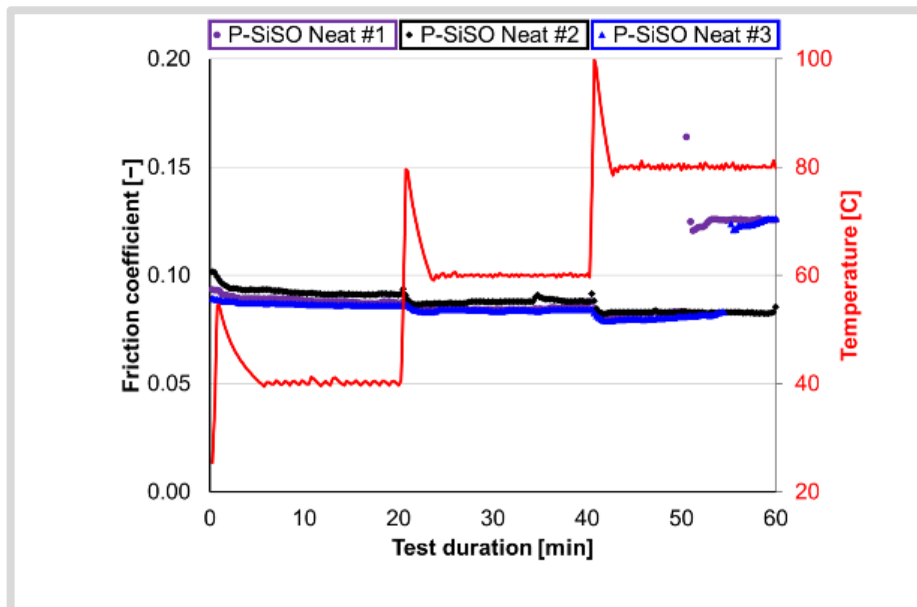

(a)



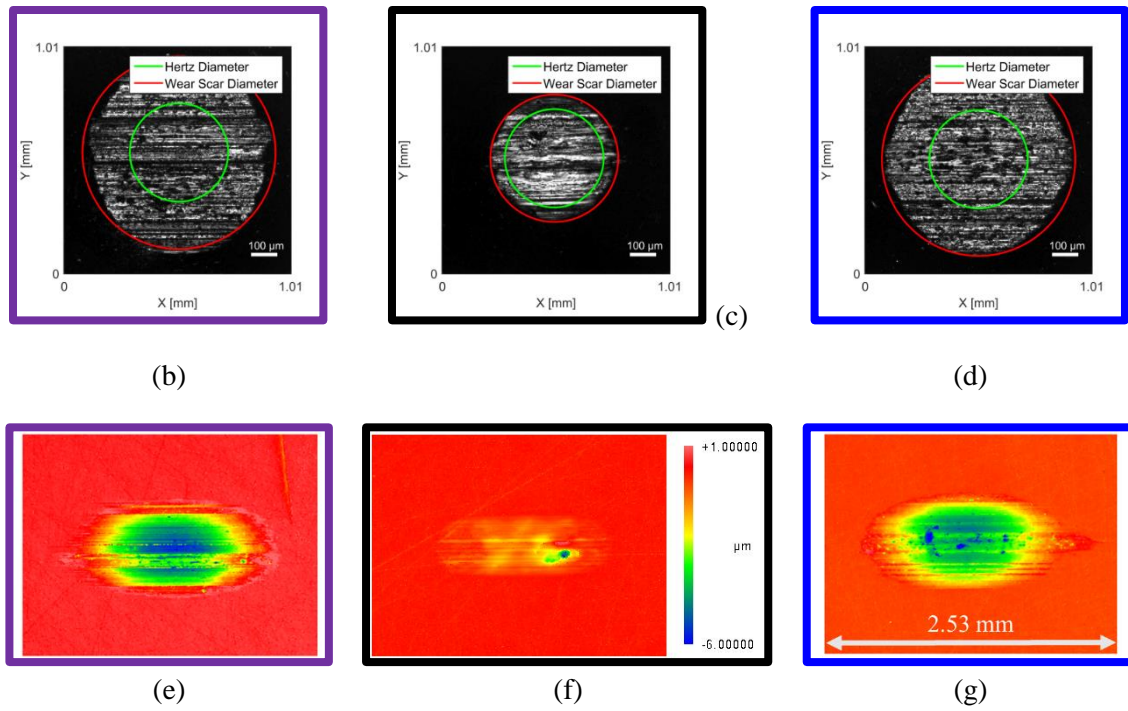

Figure S 4. Results from tribotest at condition V{300 N/40–80 °C/60 min}: (a), Abrupt change in friction at high temperature in for neat P-SiSO. (b)-(d) ball wear scars, (e)-(g) disc wear profile map, same scale is used between images.

c. Scenario III

C{300 N/80 °C/30 min}

Table 1. Ball wear scars for tests at C{300 N/80 °C/30 min}.

|                             | Test #1                                                                             | Test #2                                                                             | Test #3                                                                              | Avg.<br>W <sub>HZ</sub> |
|-----------------------------|-------------------------------------------------------------------------------------|-------------------------------------------------------------------------------------|--------------------------------------------------------------------------------------|-------------------------|
| <b>Neat<br/>P-<br/>SiSO</b> | 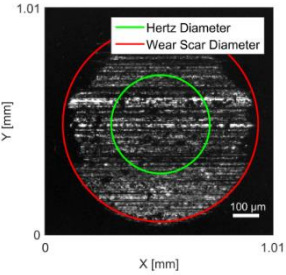   |    |                                                                                      | 2.00                    |
| <b>PNA<br/>+<br/>OPP</b>    |  |  |                                                                                      | 1.99                    |
| <b>PNA</b>                  |  |  |  | 1.15                    |
| <b>OPP</b>                  |  |  |  | 1.41                    |

Table 2. Disc wear scars for tests at C{300 N/80 °C/30 min}.

|             | Test #1                                                                             | Test #2                                                                            | Test #3                                                                               |
|-------------|-------------------------------------------------------------------------------------|------------------------------------------------------------------------------------|---------------------------------------------------------------------------------------|
| Neat P-SiSO | 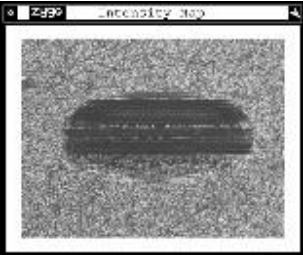   |   |                                                                                       |
| PNA+ OPP    |    |   |                                                                                       |
| PNA         |   |  |   |
| OPP         |  | 64-22-02                                                                           |  |
